# Supplementary material for: A FeCo2O4 nanowire array enabled electrochemical nitrate conversion to ammonia
Source: Royal Society of Chemistry journal article supplement (doi:10.1039/d2cc00189f), 2022-01-01
Supplement: d2cc00189f1.pdf [file d2cc00189f1.pdf]

## Electronic Supplementary Information

### Experimental section

**Materials:** Sodium nitrate ( $\text{NaNO}_3$ , 99.0%), sodium nitrite ( $\text{NaNO}_2$ , 99.0%), ammonium chloride ( $\text{NH}_4\text{Cl}$ ), sodium hydroxide ( $\text{NaOH}$ ), sodium sulfate ( $\text{Na}_2\text{SO}_4$ ), sodium salicylate ( $\text{C}_7\text{H}_5\text{NaO}_3$ ), trisodium citrate dihydrate ( $\text{C}_6\text{H}_5\text{Na}_3\text{O}_7 \cdot 2\text{H}_2\text{O}$ ), p-dimethylaminobenzaldehyde ( $\text{C}_9\text{H}_{11}\text{NO}$ ), sodium nitroferricyanide dihydrate ( $\text{C}_5\text{FeN}_6\text{Na}_2\text{O} \cdot 2\text{H}_2\text{O}$ ), 0.8 wt% sulfamic acid solution ( $\text{H}_3\text{NO}_3\text{S}$ ), sodium dihydrogen phosphate dihydrate ( $\text{NaH}_2\text{PO}_4$ ), disodium hydrogen phosphate dodecahydrate ( $\text{Na}_2\text{HPO}_4$ ) and sodium hypochlorite solution ( $\text{NaClO}$ ) were purchased from Aladdin Ltd. (Shanghai, China). Iron nitrate nonahydrate ( $\text{Fe}(\text{NO}_3)_3 \cdot 9\text{H}_2\text{O}$ ), Cobalt nitrate hexahydrate ( $\text{Co}(\text{NO}_3)_2 \cdot 6\text{H}_2\text{O}$ ), urea and ammonium fluoride ( $\text{NH}_4\text{F}$ ) were purchased from Chengdu Kelong Chemical Regent Co. Ltd. Sulfuric acid ( $\text{H}_2\text{SO}_4$ ), hydrogen peroxide ( $\text{H}_2\text{O}_2$ ), hydrochloric acid ( $\text{HCl}$ ), hydrazine monohydrate ( $\text{N}_2\text{H}_4 \cdot \text{H}_2\text{O}$ ) and ethylalcohol ( $\text{C}_2\text{H}_5\text{OH}$ ) were bought from Beijing Chemical Corporation. (China). chemical Ltd. in Chengdu. Carbon cloth (CC) was purchased from Qingyuan Metal Materials Co., Ltd (Xingtai, China). All reagents used in this work were analytical grade without further purification.

**Preparation of  $\text{FeCo}_2\text{O}_4/\text{CC}$  and  $\text{Co}_3\text{O}_4/\text{CC}$ :** All the chemicals in this work were of analytical grade and directly used after purchase without further purification.  $\text{FeCo}_2\text{O}_4$  nanowire grown on CC was prepared as following. In a typical procedure, 1 mmol of  $\text{Fe}(\text{NO}_3)_3 \cdot 9\text{H}_2\text{O}$ , 2 mmol of  $\text{Co}(\text{NO}_3)_2 \cdot 6\text{H}_2\text{O}$ , 4 mmol of  $\text{NH}_4\text{F}$  and 10 mmol of urea were dissolved in 35 mL deionized water under violent stirring for 20 min at room temperature. A piece of CC ( $1 \times 4$  cm) was immersed with concentrated  $\text{HNO}_3$  solution for 2 h, and then cleaned with acetone, ethanol and deionized water for 10 min each. The solution was transferred into a 40 mL Teflon-lined autoclave and the cleaned CC substrate was immersed into the solution. The autoclave was sealed and maintained at  $120^\circ\text{C}$  for 6 h. After the autoclave cooling to room temperature naturally, as-obtained precursor was taken out, washed with ethanol and distilled water for several times, and dried at  $70^\circ\text{C}$  for 2 h. Finally, the precursor was put in a muffle furnace and annealed at  $400^\circ\text{C}$  in air for 2 h to obtain  $\text{FeCo}_2\text{O}_4$  nanowire

---

supported on CC.  $\text{Co}_3\text{O}_4/\text{CC}$  as one control catalyst was also prepared under otherwise identical conditions used for preparing  $\text{FeCo}_2\text{O}_4/\text{CC}$  except without adding Fe salt in the hydrothermal process.

**Preparation of  $\text{Fe}_2\text{O}_3/\text{CC}$ :**  $\text{Fe}_2\text{O}_3/\text{CC}$  was prepared as follows. 0.6 g  $\text{Fe}(\text{NO}_3)_3 \cdot 9\text{H}_2\text{O}$  and 0.24 g  $\text{Na}_2\text{SO}_4$  was diluted into 35 mL aqueous solution. Then the solution was transferred into a Teflon-lined stainless autoclave (50 mL), and a piece of CC (1 cm  $\times$  4 cm) was immersed into the autoclave contained solution. The autoclave was sealed and maintained at 120 °C for 6 h in an electric oven. After the autoclave cooled down naturally to room temperature, the  $\text{Fe}_2\text{O}_3/\text{CC}$  was obtained after annealing in Ar gas at 450 °C for 3 h.

**Characterizations:** XRD data were acquired by a LabX XRD-6100 X-ray diffractometer with a Cu  $K\alpha$  radiation (40 kV, 30 mA) of wavelength 0.154 nm (SHIMADZU, Japan). SEM measurements were carried out on a GeminiSEM 300 scanning electron microscope (ZEISS, Germany) at an accelerating voltage of 5 kV. XPS measurements were performed on an ESCALABMK II X-ray photoelectron spectrometer using Mg as the exciting source. The absorbance data of spectrophotometer was measured on UV-Vis spectrophotometer. TEM image was obtained from a Zeiss Libra 200FE transmission electron microscope operated at 200 kV.

**Electrochemical measurements:** All electrochemical measurements were performed in a two-compartment cell separated by a treated Nafion 117 membrane using the CHI660E electrochemical workstation (Shanghai, Chenhua) with a standard three-electrode setup. Electrolyte solution was Ar-saturated 0.1 M NaOH with 20 mM  $\text{NO}_3^-$ , using  $\text{FeCo}_2\text{O}_4/\text{CC}$  (1.0  $\times$  0.5  $\text{cm}^2$ ) as the working electrode, a carbon rod as the counter electrode, and a Hg/HgO as the reference electrode. All the potentials reported in our work were converted to reversible hydrogen electrode (RHE) scale via calibration with the following equation:  $E(\text{RHE}) = E(\text{vs. Hg/HgO}) + 0.0591 \times \text{pH} + 0.098 \text{ V}$  and the current density was normalized by the geometric surface area.

**Determination of  $\text{NH}_3$ :** Concentration of produced  $\text{NH}_3$  was determined by spectrophotometry measurement with indophenol blue method (the obtained

---

electrolyte was diluted 40 times).<sup>1</sup> In detail, 2 mL of the diluted catholyte was obtained from the cathodic chamber and mixed with 2 mL of a 1 M NaOH solution that contained salicylic acid and sodium citrate. Then, 1 mL of 0.05 M NaClO and 0.2 mL of 1 wt% C<sub>5</sub>FeN<sub>6</sub>Na<sub>2</sub>O were dropped in the collected electrolyte solution. After standing at room temperature for 2 h, the ultraviolet-visible absorption spectrum was measured. The concentration-absorbance curve was calibrated using the standard NH<sub>4</sub>Cl solution with NH<sub>3</sub> concentrations of 0, 0.2, 0.5, 1.0, 2.0 and 5.0 µg mL<sup>-1</sup> in 0.1 M NaOH. The absorbance at 655 nm was measured to quantify the NH<sub>3</sub> concentration using standard NH<sub>4</sub>Cl solutions ( $y = 0.4407x + 0.0318$ ,  $R^2 = 0.9999$ ).

**Determination of NO<sub>3</sub><sup>-</sup>:** Firstly, 0.05 mL electrolyte was taken out from the electrolytic cell and diluted to 5 mL to detection range. Then, 0.1 mL 1 M HCl and 0.01 mL 0.8 wt% H<sub>3</sub>NO<sub>3</sub>S solution were added into the aforementioned solution. After 15 minutes, the absorbance was detected by UV-Vis spectrophotometry at a wavelength of 220 nm and 275 nm. The final absorbance of NO<sub>3</sub><sup>-</sup> was calculated based on the following equation:  $A = A_{220\text{nm}} - 2A_{275\text{nm}}$ . The calibration curve can be obtained through different concentrations of NaNO<sub>3</sub> solutions and the corresponding absorbance. The fitting curve ( $y = 0.05549x - 0.00442$ ,  $R^2 = 0.9993$ ) shows good linear relation of absorbance value with NO<sub>3</sub><sup>-</sup> concentration.

**Determination of NO<sub>2</sub><sup>-</sup>:** Owing to the large concentration of solution, the obtained reaction solutions were diluted 5 times. The NO<sub>2</sub><sup>-</sup> concentration was analyzed using the Griess test.<sup>2</sup> The Griess reagent was prepared by dissolving 0.1 g N-(1-naphthyl) ethylenediamine dihydrochloride, 1.0 g sulfonamide and 2.94 mL H<sub>3</sub>PO<sub>4</sub> in 50 mL deionized water. In a typical colorimetric assay, the 1.0 mL Griess reagent was mixed with the 1.0 mL nitrite-containing solution and 2.0 mL H<sub>2</sub>O and allowed to react at room temperature for 10 min, in which sulfonamide reacts with NO<sub>2</sub><sup>-</sup> to form a diazonium salt and then further reacts with amine to form an azo dye (magenta). The absorbance at 540 nm was measured to quantify the NO<sub>2</sub><sup>-</sup> concentration with a standard curve of NO<sub>2</sub><sup>-</sup> ( $y = 0.22194x + 0.03249$ ,  $R^2 = 0.9998$ ).

**Determination of N<sub>2</sub>H<sub>4</sub>:** In this work, we used the method of Watt and Chrisp<sup>2</sup> to determine the concentration of produced N<sub>2</sub>H<sub>4</sub>. The chromogenic reagent was a mixed

---

solution of 5.99 g C<sub>9</sub>H<sub>11</sub>NO, 30 mL HCl and 300 mL C<sub>2</sub>H<sub>5</sub>OH. In detail, 1 mL electrolyte was added into 1 mL prepared color reagent and stirred for 15 min in the dark. The absorbance at 455 nm was measured to quantify the N<sub>2</sub>H<sub>4</sub> concentration with a standard curve of hydrazine ( $y = 0.6871x + 0.10688$ ,  $R^2 = 0.9998$ ).

**Calculations of FE, NH<sub>3</sub> yield, selectivity and conversion rate:**

$$FE = (8 \times F \times [\text{NH}_3] \times V) / (M_{\text{NH}_3} \times Q) \times 100\%$$

$$\text{NH}_3 \text{ yield} = ([\text{NH}_3] \times V) / (M_{\text{NH}_3} \times t \times A)$$

$$\text{Selectivity} = [\text{NH}_3] / \Delta[\text{NO}_3^-] \times 100\%$$

$$\text{Conversion rate} = \Delta[\text{NO}_3^-] / [\text{NO}_3^-] \times 100\%$$

Where F is the Faradic constant (96485 C mol<sup>-1</sup>), [NH<sub>3</sub>] is the measured NH<sub>3</sub> concentration, V is the volume of electrolyte in the anode compartment (70 mL), M<sub>NH<sub>3</sub></sub> is the molar mass of NH<sub>3</sub>, Q is the total quantity of applied electricity, t is the electrolysis time, A is the loaded area of catalyst (1.0 × 0.5 cm<sup>2</sup>), [NO<sub>3</sub><sup>-</sup>] is the initial concentration of NO<sub>3</sub><sup>-</sup> and Δ[NO<sub>3</sub><sup>-</sup>] is the concentration difference of NO<sub>3</sub><sup>-</sup> before and after electrolysis.

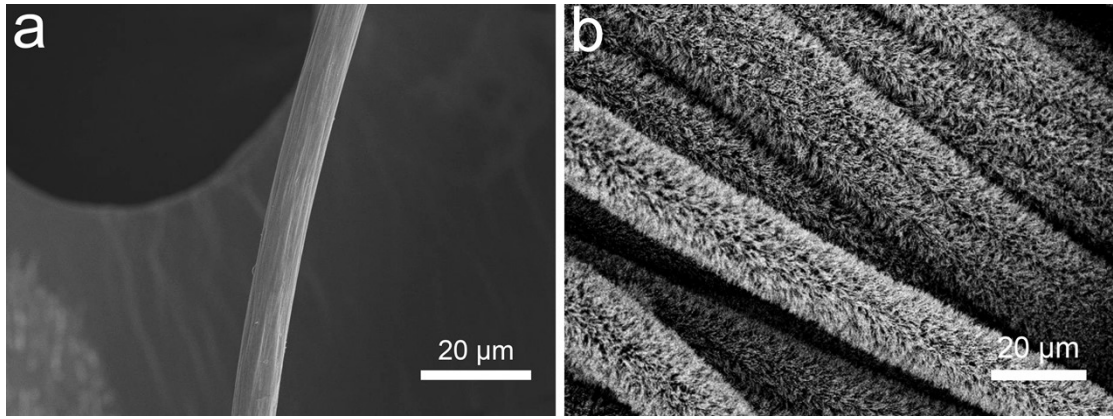

**Fig. S1.** SEM images of (a) bare CC and (b) FeCo<sub>2</sub>O<sub>4</sub>/CC.

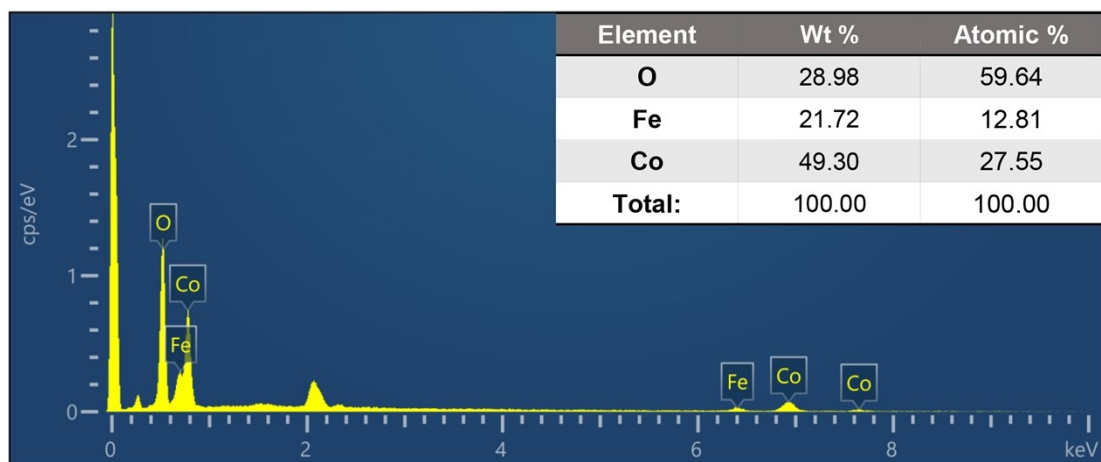

**Fig. S2.** EDX spectrum of FeCo<sub>2</sub>O<sub>4</sub>/CC.

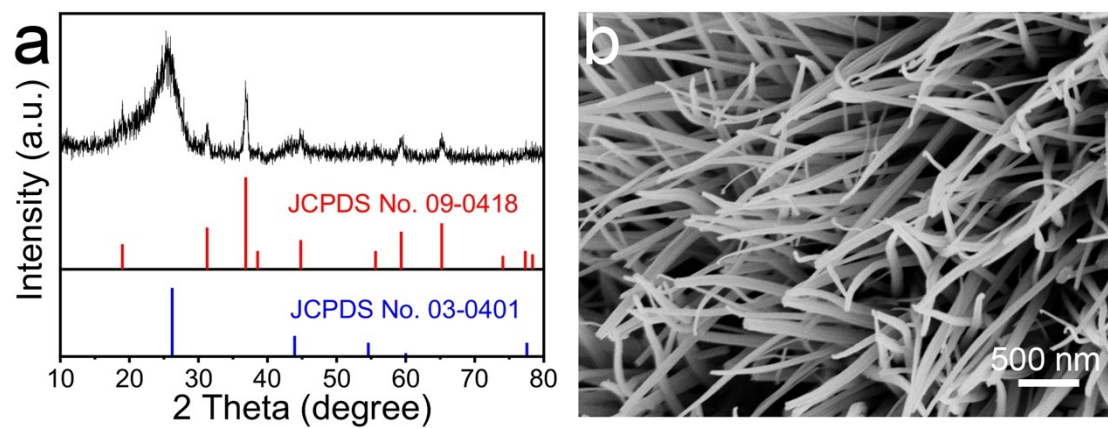

**Fig. S3.** (a) XRD pattern and (b) SEM image of  $\text{Co}_3\text{O}_4/\text{CC}$ .

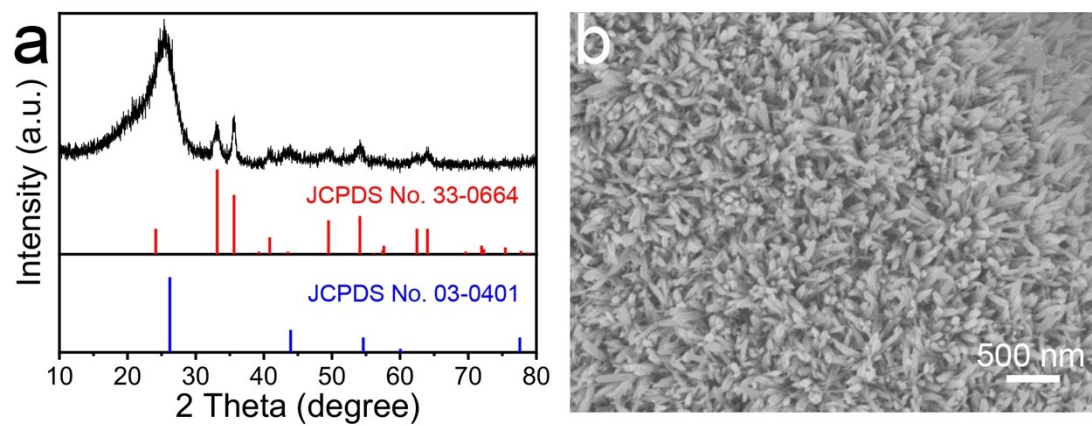

**Fig. S4.** (a) XRD pattern and (b) SEM image of Fe<sub>2</sub>O<sub>3</sub>/CC.



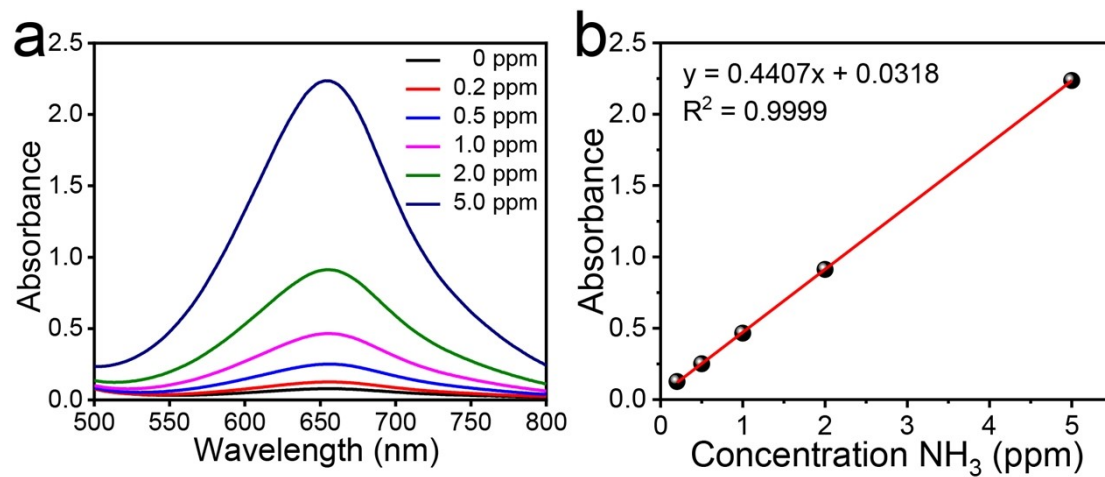

**Fig. S5.** (a) UV-Vis absorption spectra of indophenol assays kept with different concentrations of  $\text{NH}_4^+$  after incubated for 2 h at room temperature. (b) Calibration curve used for estimation of  $\text{NH}_4^+$  concentration.

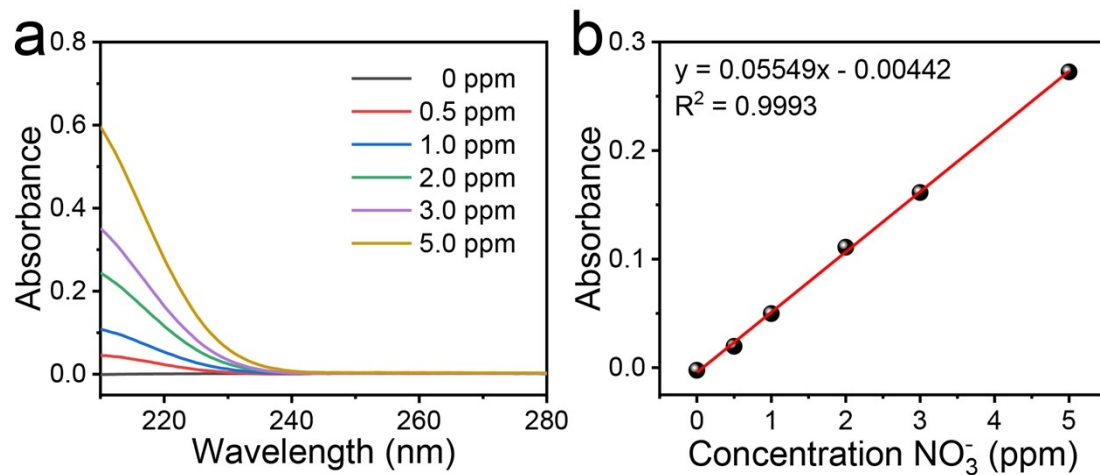

**Fig. S6.** UV-Vis absorption spectra of various  $\text{NO}_3^-$  concentrations after incubated for 15 min at room temperature. (b) Calibration curve used for calculation of  $\text{NO}_3^-$  concentration.

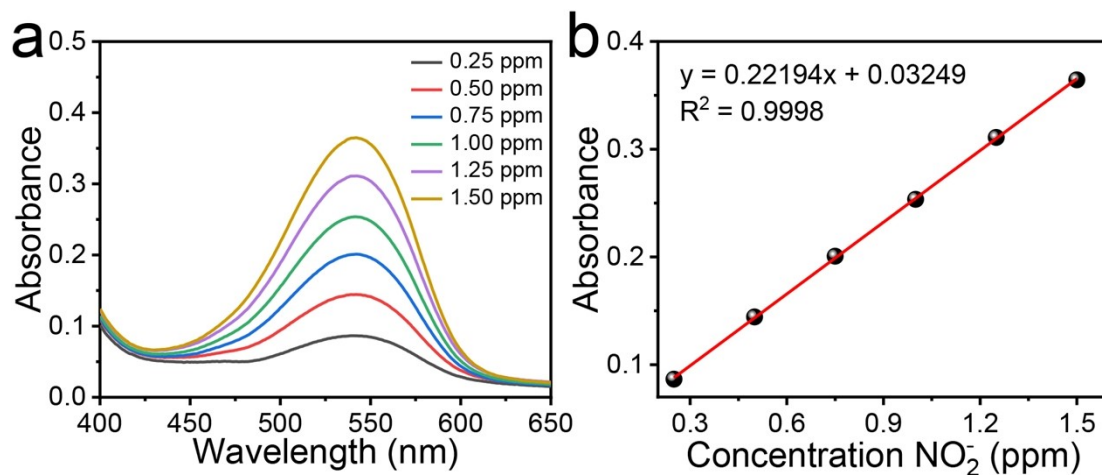

**Fig. S7.** UV-Vis absorption spectra of various  $\text{NO}_2^-$  concentrations after incubated for 10 min at room temperature. (b) Calibration curve used for quantification of  $\text{NO}_2^-$  concentration.

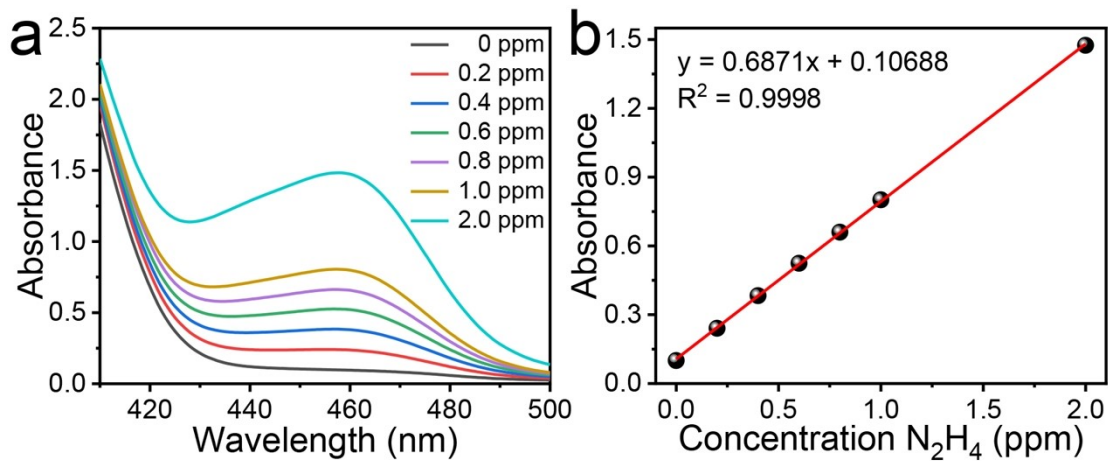

**Fig. S8.** (a) UV-Vis absorption spectra of various  $N_2H_4$  concentrations after incubated for 15 min at room temperature. (b) Calibration curve used for calculation of  $N_2H_4$  concentration.

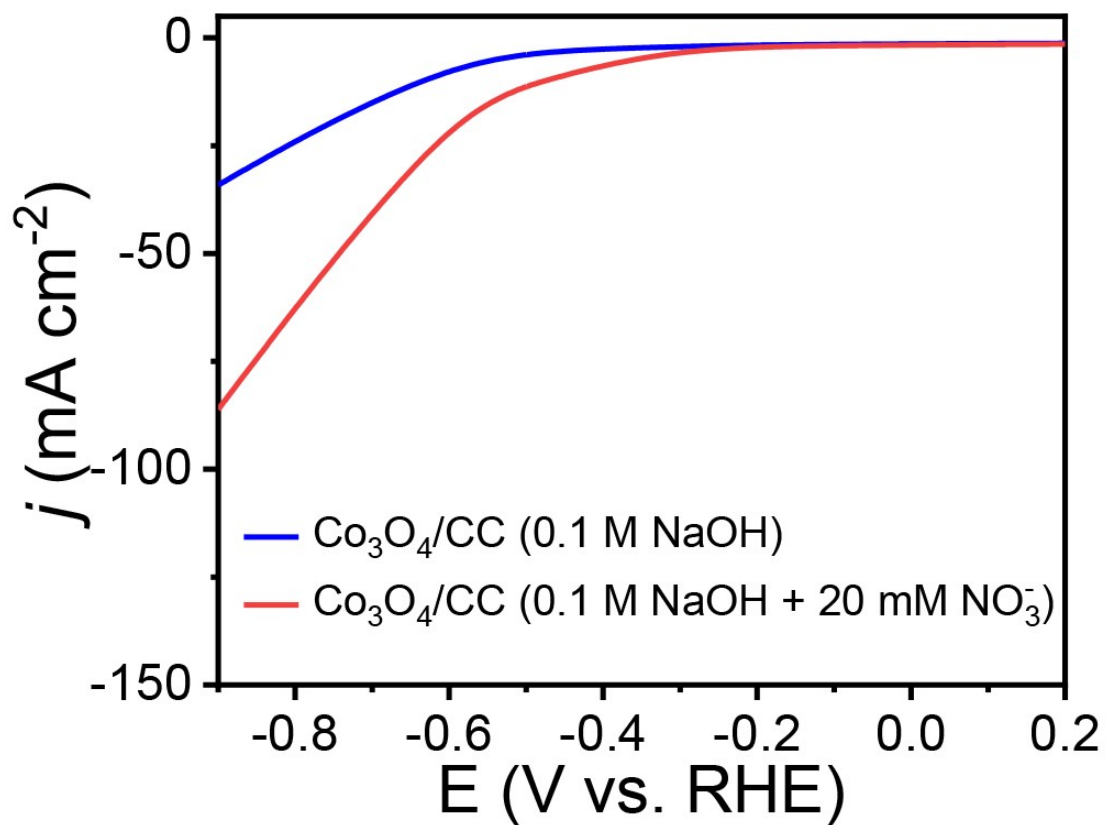

**Fig. S9.** LSV curves of Co<sub>3</sub>O<sub>4</sub>/CC in 0.1 M NaOH with and without 20 mM NO<sub>3</sub><sup>-</sup>.

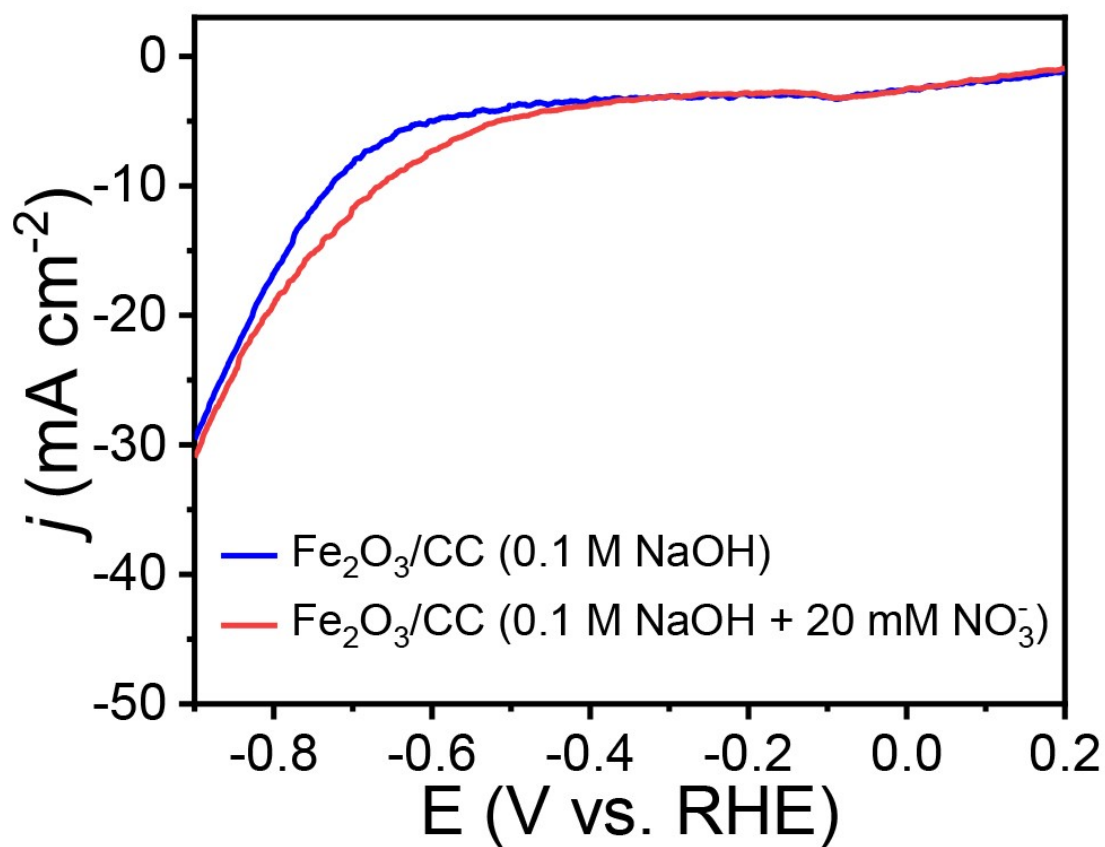

**Fig. S10.** LSV curves of Fe<sub>2</sub>O<sub>3</sub>/CC in 0.1 M NaOH with and without 20 mM NO<sub>3</sub><sup>-</sup>.

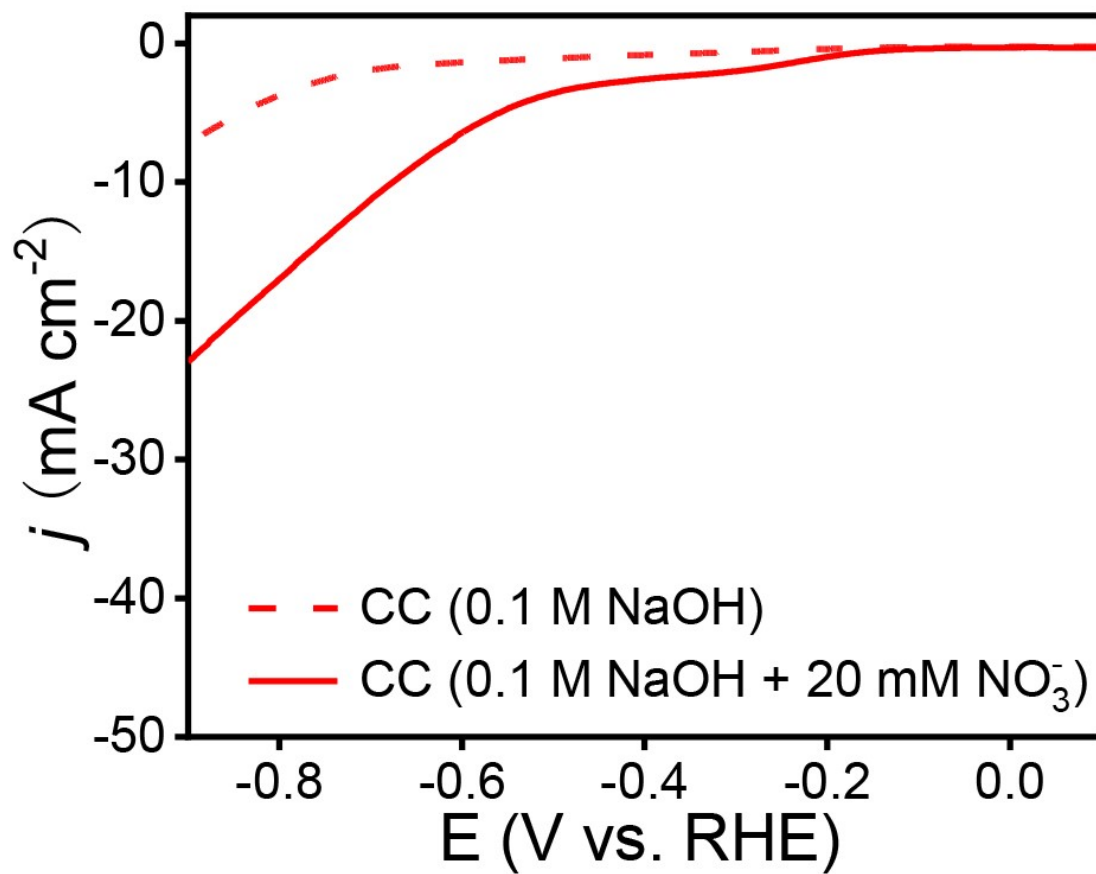

**Fig. S11.** LSV curves of bare CC in 0.1 M NaOH with and without 20 mM NO<sub>3</sub><sup>-</sup>.

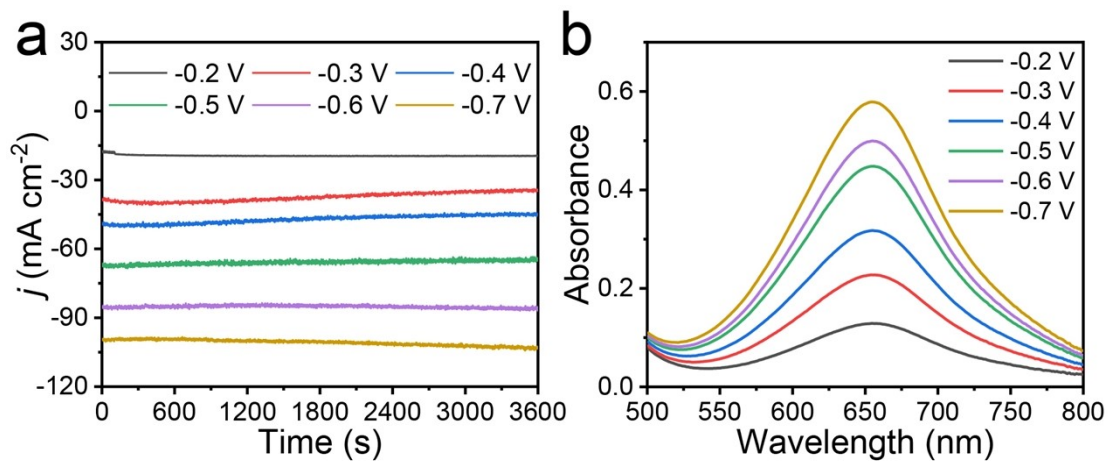

**Fig. S12.** (a) Chronoamperometry curves and (b) corresponding UV-Vis absorption spectra.



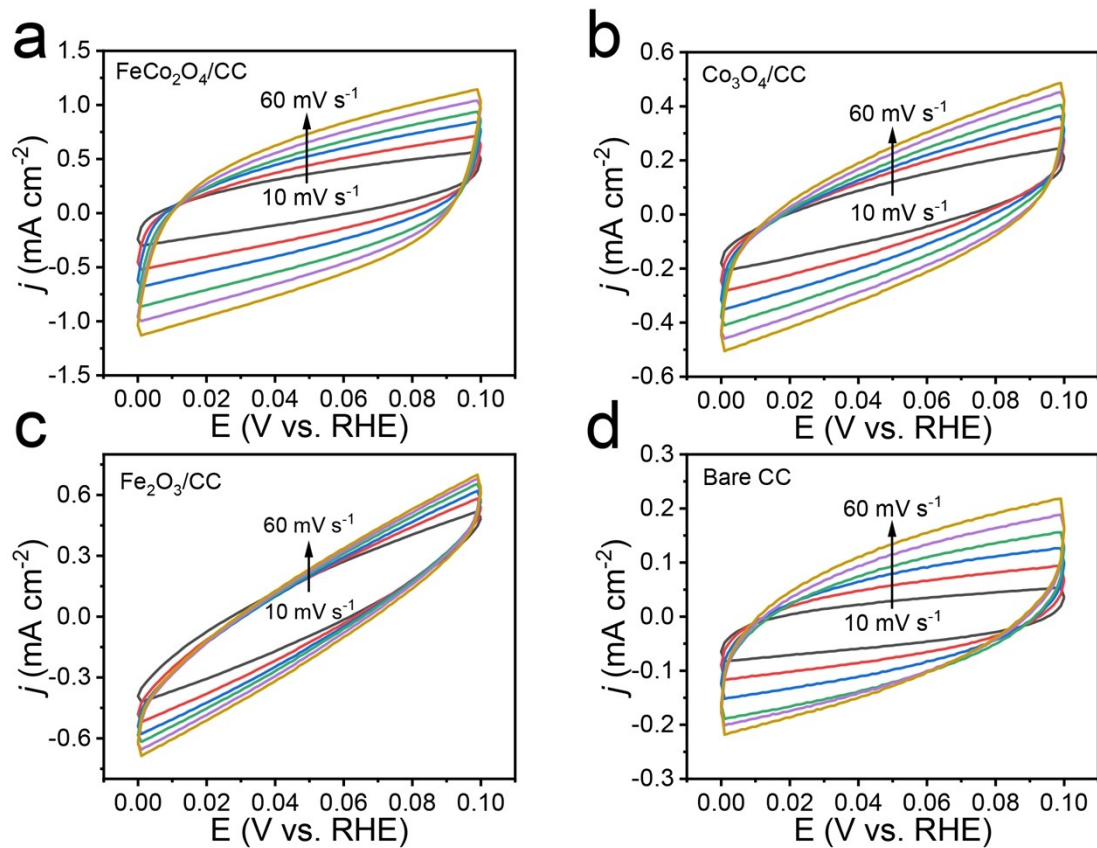

**Fig. S13.** CV curves of (a)  $\text{FeCo}_2\text{O}_4/\text{CC}$ , (b)  $\text{Co}_3\text{O}_4/\text{CC}$ , (c)  $\text{Fe}_2\text{O}_3/\text{CC}$  and (d) bare CC recorded in the non-Faradaic region of 0–0.1 V at various scan rates (10–60  $\text{mV s}^{-1}$ ). The electrochemical double-layer capacitances ( $C_{dl}$ ) are the slopes of the linear fits.

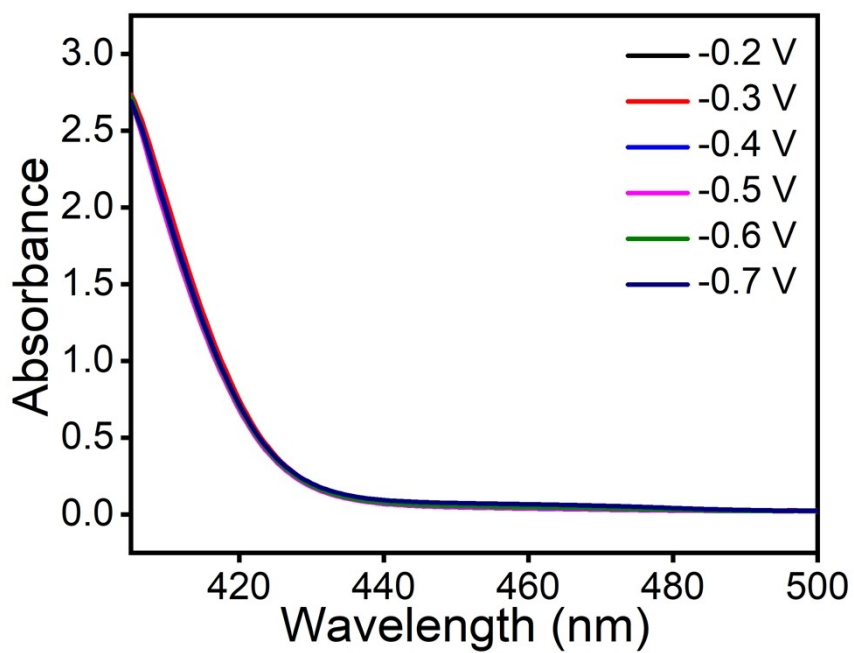

**Fig. S14.** UV-Vis absorption spectra of the electrolytes estimated by the method of Watt and Chrisp for the calculation of  $\text{N}_2\text{H}_4$  concentration.

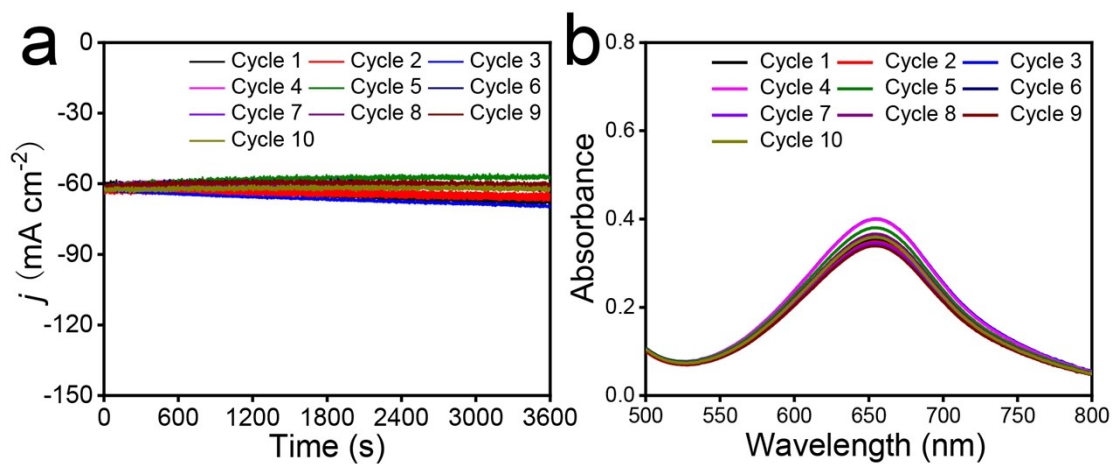

**Fig. S15.** (a) Chronoamperometry curves and (b) corresponding UV-Vis absorption spectra of FeCo<sub>2</sub>O<sub>4</sub>/CC for electrogenerated NH<sub>3</sub> during recycling tests at -0.5 V.

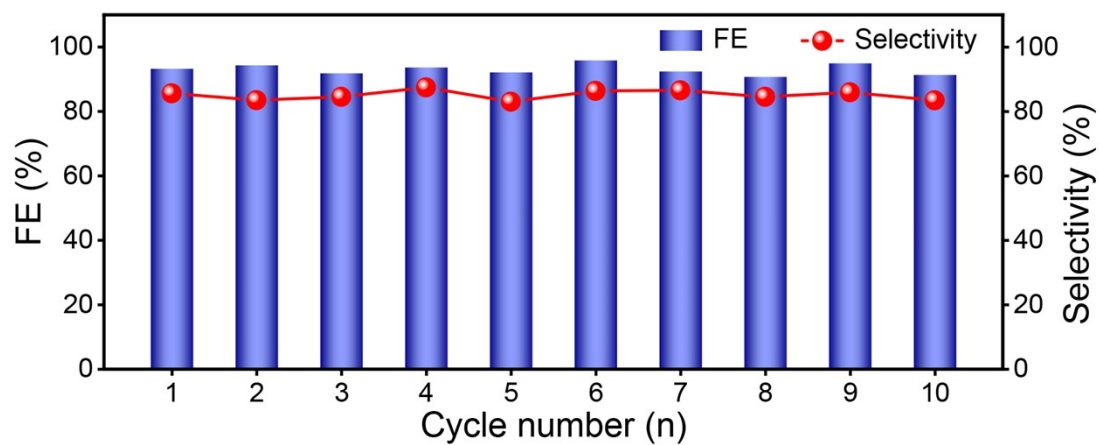

**Fig. S16.** Selectivity and FEs for  $\text{NH}_3$  during recycling test at  $-0.5$  V.

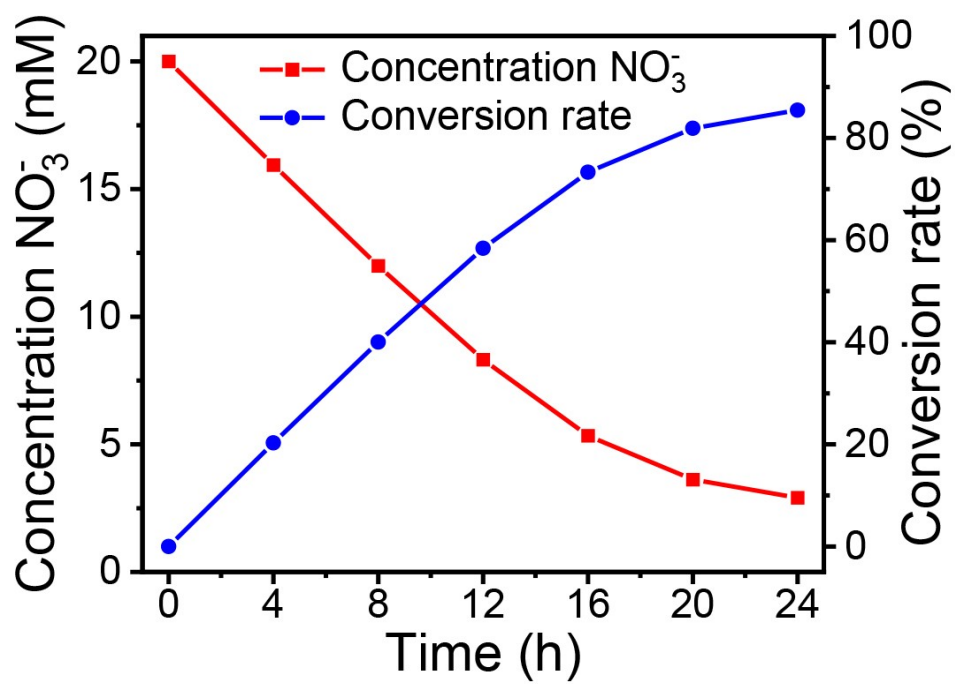

**Fig. S17.** Conversion rates and concentrations of  $\text{NO}_3^-$  during 24-h electrolysis at  $-0.5$  V.

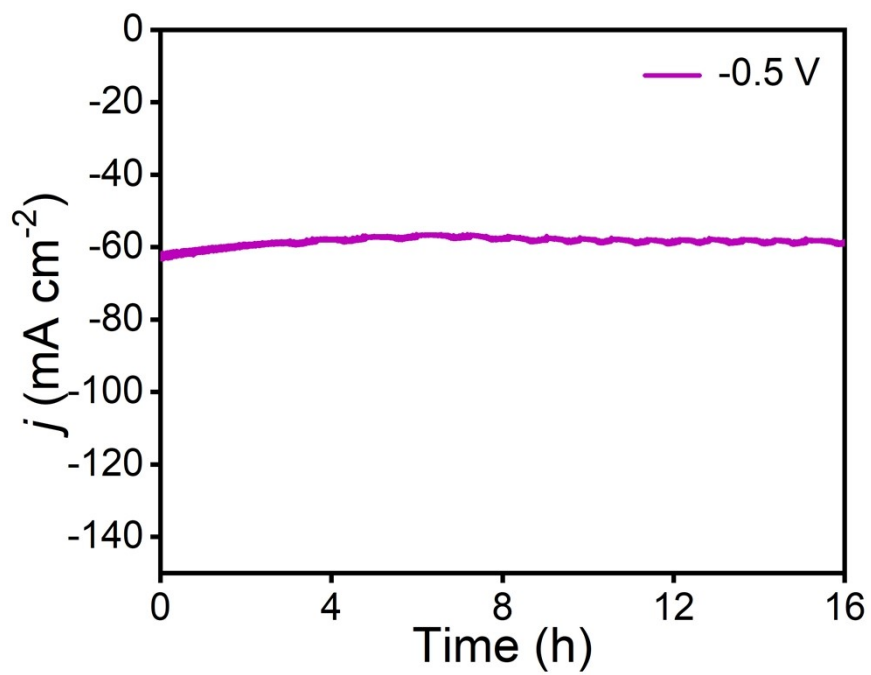

**Fig. S18.** Chronoamperometry curve of FeCo<sub>2</sub>O<sub>4</sub>/CC at -0.5 V for 16 h.

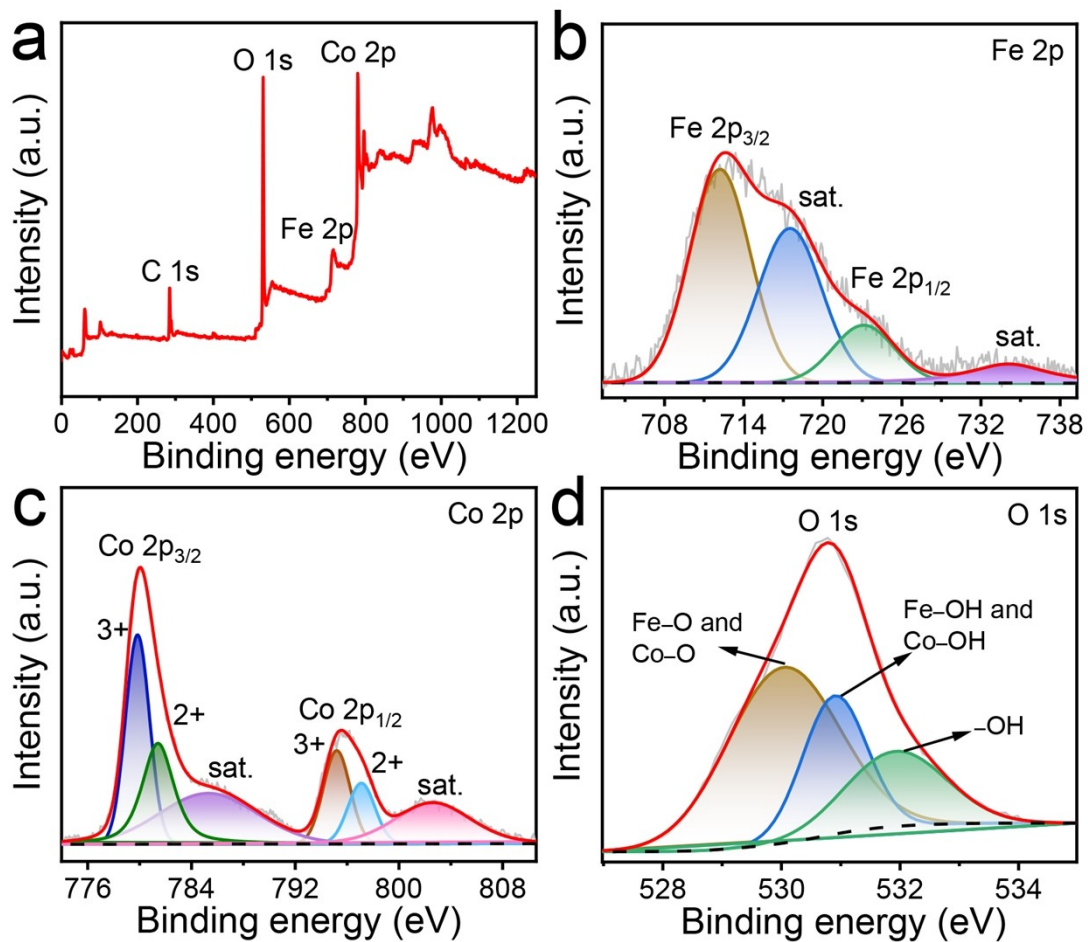

**Fig. S19.** (a) XPS survey spectrum for post-test FeCo<sub>2</sub>O<sub>4</sub>/CC. High-resolution XPS spectra of (b) Fe 2p, (c) Co 2p and (d) O 1s.

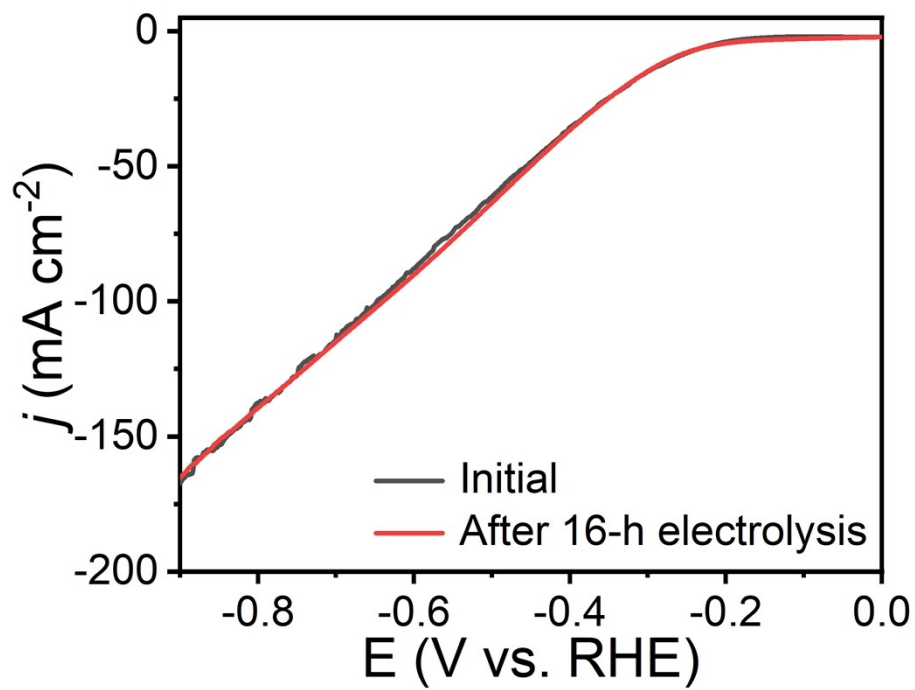

**Fig. S20.** LSV curves of FeCo<sub>2</sub>O<sub>4</sub>/CC before and after 16-h electrolysis.



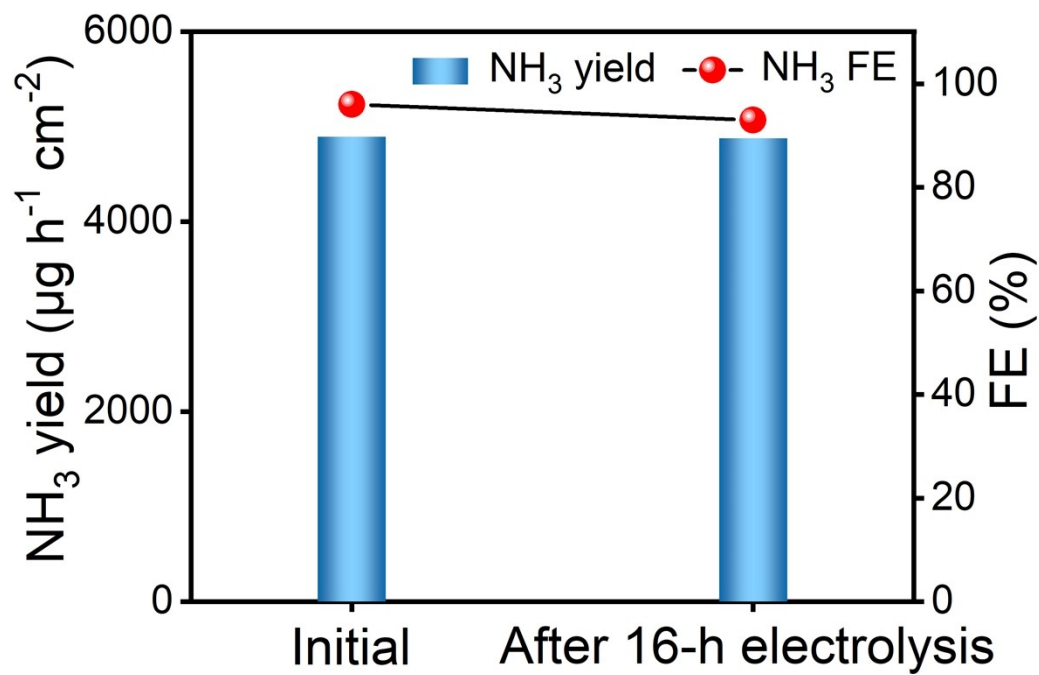

Fig. S21. NH<sub>3</sub> yields and FEs of FeCo<sub>2</sub>O<sub>4</sub>/CC before and after 16-h electrolysis.

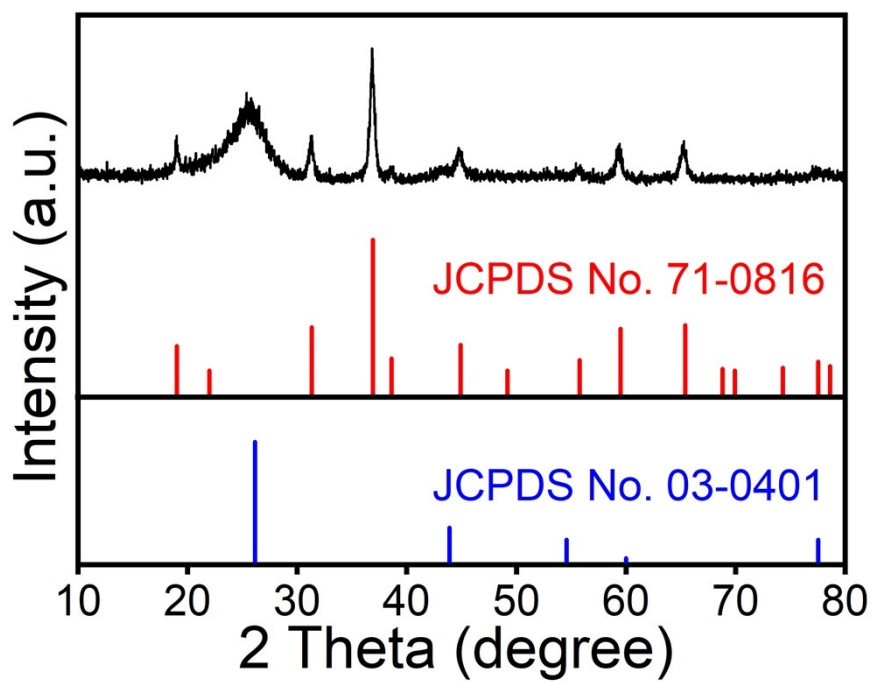

Fig. S22. XRD pattern of  $\text{FeCo}_2\text{O}_4/\text{CC}$  after 16-h electrolysis.

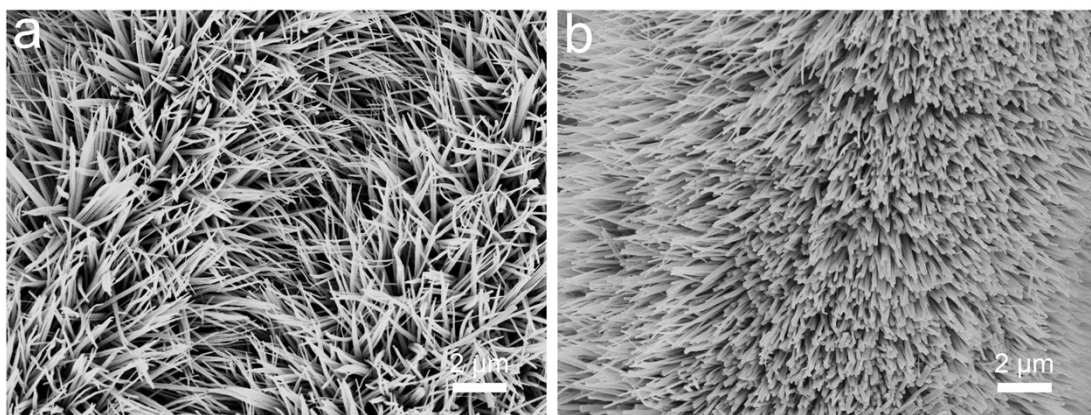

**Fig. S23.** SEM images of FeCo<sub>2</sub>O<sub>4</sub>/CC (a) before and (b) after 16-h electrolysis.

**Table S1.** Comparison of catalytic performance of FeCo<sub>2</sub>O<sub>4</sub>/CC with other reported NO<sub>3</sub>RR electrocatalysts.

| Catalyst                              | Electrolyte                                       | NH <sub>3</sub> yield@Potential (V vs. RHE)                      | FE@Potential (V vs. RHE) | Ref.      |
|---------------------------------------|---------------------------------------------------|------------------------------------------------------------------|--------------------------|-----------|
| FeCo <sub>2</sub> O <sub>4</sub> /CC  | 0.1 M NaOH (20 mM NO <sub>3</sub> <sup>-</sup> )  | 4988 μg h <sup>-1</sup> cm <sup>-2</sup> @-0.5                   | 95.9%@-0.5               | This work |
| Pd facets                             | 0.1 M NaOH (20 mM NO <sub>3</sub> <sup>-</sup> )  | 306.8 μg h <sup>-1</sup> cm <sup>-2</sup> @-0.2                  | 35%@-0.2                 | 3         |
| Ni NP                                 | 1 M NaOH (20 mM NO <sub>3</sub> <sup>-</sup> )    | /                                                                | 46.3%@-0.27              | 4         |
| Pd/TiO <sub>2</sub>                   | 0.5 M NaOH (250 mM NO <sub>3</sub> <sup>-</sup> ) | 1120 μg h <sup>-1</sup> cm <sup>-2</sup> @-0.7                   | 92%@-0.7                 | 5         |
| Cu                                    | 1 M NaOH (0.1 M NO <sub>3</sub> <sup>-</sup> )    | /                                                                | 79%                      | 6         |
| In-S-G                                | 1 M KOH (100 mM NO <sub>3</sub> <sup>-</sup> )    | 3740 μg h <sup>-1</sup> mg <sub>cat.</sub> <sup>-1</sup> @-0.5   | 75%@-0.5                 | 7         |
| Fe SAC                                | 1 M KOH (100 mM NO <sub>3</sub> <sup>-</sup> )    | /                                                                | 86%@-0.21                | 8         |
| CuNiCe alloy                          | 0.5 M KOH (50 mM NO <sub>3</sub> <sup>-</sup> )   | /                                                                | 90%@-0.3                 | 9         |
| BC <sub>2</sub> N/Pd                  | 0.1 M KOH (250 mM NO <sub>3</sub> <sup>-</sup> )  | 1730 μg h <sup>-1</sup> cm <sup>-2</sup> @-0.7                   | 97.42%@-0.3              | 10        |
| Fe-PPy SACs                           | 0.1 M KOH (100 mM NO <sub>3</sub> <sup>-</sup> )  | 2750 μg h <sup>-1</sup> cm <sup>-2</sup> @-0.7                   | ~100%@-0.3               | 11        |
| BCN@Ni                                | 0.1 M KOH (100 mM NO <sub>3</sub> <sup>-</sup> )  | 2320.2 μg h <sup>-1</sup> cm <sup>-2</sup> @-0.5                 | 91.15%@-0.3              | 12        |
| Ni <sub>3</sub> B@NiB <sub>2.74</sub> | 0.1 M KOH (100 mM NO <sub>3</sub> <sup>-</sup> )  | 3371.1 μg h <sup>-1</sup> cm <sup>-2</sup> @-0.3                 | ~100%@-0.3               | 13        |
| BCN-Cu                                | 0.1 M KOH (100 mM NO <sub>3</sub> <sup>-</sup> )  | 1900.07 μg h <sup>-1</sup> cm <sup>-2</sup> @-0.5                | 98.23%@-0.5              | 14        |
| ZnCo <sub>2</sub> O <sub>4</sub>      | 0.1 M KOH (100 mM NO <sub>3</sub> <sup>-</sup> )  | 2101.2 μg h <sup>-1</sup> mg <sub>cat.</sub> <sup>-1</sup> @-0.6 | 95.4%@-0.4               | 15        |
| Cu nanosheets                         | 0.1 M KOH (10 mM NO <sub>3</sub> <sup>-</sup> )   | 390.1 μg h <sup>-1</sup> mg <sub>cat.</sub> <sup>-1</sup> @-0.15 | 99.7%@-0.15              | 16        |
| Cu <sub>50</sub> Ni <sub>50</sub>     | 1 M KOH (10 mM NO <sub>3</sub> <sup>-</sup> )     | /                                                                | 84 ± 2%                  | 17        |

---

## References

- 1 D. Zhu, L. Zhang, R. E. Ruther and R. J. Hamers, *Nat. Mater.*, 2013, **12**, 836–841.
- 2 G. W. Watt and J. D. Chrisp, *Anal. Chem.*, 1952, **24**, 2006–2008.
- 3 J. Lim, C. Liu, J. Park, Y. Liu, T. P. Senftle, S. W. Lee and M. C. Hatzell, *ACS Catal.*, 2021, **11**, 7568–7577.
- 4 L. Mattarozzi, S. Cattarin, N. Comisso, P. Guerriero, M. Musiani, L. Vázquez-Gómez and E. Verlato, *Electrochim. Acta*, 2013, **89**, 488–496.
- 5 Y. Guo, R. Zhang, S. Zhang, Y. Zhao, Q. Yang, Z. Huang, B. Dong and C. Zhi, *Energy Environ. Sci.*, 2021, **14**, 3938–3944.
- 6 D. Reyter, G. Chamoulaud, D. Bélanger and L. Roué, *J. Electroanal. Chem.*, 2006, **596**, 13–24.
- 7 F. Lei, W. Xu, J. Yu, K. Li, J. Xie, P. Hao, G. Cui and B. Tang, *Chem. Eng. J.*, 2021, **426**, 131317.
- 8 Z. Wu, M. Karamad, X. Yong, Q. Huang, D. A. Cullen, P. Zhu, C. Xia, Q. Xiao, M. Shakouri, F. Chen, J. Y. Kim, Y. Xia, K. Heck, Y. Hu, M. S. Wong, Q. Li, I. Gates, S. Siahrostami and H. Wang, *Nat. Commun.*, 2021, **12**, 2870.
- 9 C. Lu, S. Lu, W. Qiu and Q. Liu, *Electrochim. Acta*, 1999, **52**, 2193–2197.
- 10 X. Li, X. Zhao, Y. Zhou, J. Hu, H. Zhang, X. Hu and G. Hu, *Appl. Surf. Sci.*, 2022, **584**, 152556.
- 11 P. Li, Z. Jin, Z. Fang and G. Yu, *Energy Environ. Sci.*, 2021, **14**, 3522–3531.
- 12 X. Zhao, Z. Zhu, Y. He, H. Zhang, X. Zhou, W. Hu, M. Li, S. Zhang, Y. Dong, X. Hu, A. V. Kuklin, G. V. Baryshnikov, H. Ågren, T. Wågberg and G. Hu, *Chem. Eng. J.*, 2022, **433**, 133190.
- 13 L. Li, C. Tang, X. Cui, Y. Zheng, X. Wang, H. Xu, S. Zhang, T. Shao, K. Davey and S. Qiao, *Angew. Chem., Int. Ed.*, 2021, **60**, 14131–14137.
- 14 X. Zhao, X. Jia, Y. He, H. Zhang, X. Zhou, H. Zhang, S. Zhang, Y. Dong, X. Hu, A. V. Kuklin, G. V. Baryshnikov, H. Ågren and G. Hu, *Appl. Mater. Today*, 2021, **25**, 101206.

- 
- 15 P. Huang, T. Fan, X. Ma, J. Zhang, Z. Chen and X. Yi, *ChemSusChem*, 2022, DOI: 10.1002/cssc.202102049.
- 16 X. Fu, X. Zhao, X. Hu, K. He, Y. Yu, T. Li, Q. Tu, X. Qian, Q. Yue, M. R. Wasielewski and Y. Kang, *Appl. Mater. Today*, 2020, **19**, 100620.
- 17 Y. Wang, A. Xu, Z. Wang, L. Huang, J. Li, F. Li, J. Wicks, M. Luo, D. H. Nam, C. Tan, Y. Ding, J. Wu, Y. Lum, C. T. Dinh, D. Sinton, G. Zheng and E. H. Sargent, *J. Am. Chem. Soc.*, 2020, **142**, 5702–5708.
